# Supplementary material for: Small Toxic Protein Encoded on Chromosome VII of Saccharomyces cerevisiae
Source: PLoS One. 2015 Mar 17;10(3):e0120678. doi: 10.1371/journal.pone.0120678 (PMC4363601; doi:10.1371/journal.pone.0120678)
Supplement: S2 Table — (XLSX) [file pone.0120678.s002.xlsx]

## Sheet: 3 compare (3)
Table S2. Genes identified by the RNAseq analysis
Gene name	pTOW-DIE2-Rear2/pTOWug2-836		pTOWug2-DIE2-Rear2/pTOW40836		pTOWug2-836/pTOW40836
	Fold change	Significance (FDR < 0.5)	Fold change	Significance (FDR < 0.5)	Fold change	Significance (FDR < 0.5)
RPA12	4.84501	yes	2.8176	no	2.07125	no
RNR1	3.80154	no	3.74096	yes	0.104415	no
YPL272C	3.66643	no	4.21808	yes	-0.507821	no
SFG1	3.3832	no	3.73742	yes	-0.310396	no
DAN1	3.24261	no	5.36309	yes	-2.07665	no
ERG1	3.17155	no	3.1692	yes	0.0461783	no
ERG11	3.08096	no	3.93503	yes	-0.810239	no
MAK16	2.94523	no	3.12016	yes	-0.131099	no
TIR4	2.7374	no	4.91331	yes	-2.13208	no
ERG3	2.72413	no	4.01885	yes	-1.25089	no
FUN30	2.53842	no	3.08904	yes	-0.506795	no
TPO2	2.37881	no	3.18584	yes	-0.763198	no
DAN4	2.27153	no	3.32018	yes	-1.00482	no
TIR3	1.99277	no	4.39773	yes	-2.36113	no
EXG1	1.53826	no	3.10863	yes	-1.52653	no
YJR005C-A	1.09089	no	4.81398	yes	-3.67926	no
ERG25	0.710154	no	3.73421	yes	-2.98023	no
BTN2	0.0953232	no	-3.55273	yes	3.69188	no
ISF1	-3.37486	no	-3.34123	yes	0.0102014	no
PUT1	-3.48989	no	-3.94607	yes	0.500007	no
ADH4	-3.74712	no	-3.21295	yes	-0.49034	no
NCE103	-3.83904	no	-4.86817	yes	1.07296	no
HXT7	-3.99983	no	-3.296	yes	-0.660001	no
FMP43	-4.0488	no	-3.16141	yes	-0.843557	no
YNL194C	-4.08786	no	-3.25115	yes	-0.792876	no
TMA10	-4.11183	no	-3.58069	yes	-0.487309	no
SMA1	-4.19798	yes	-2.43288	no	-1.72127	no
YNL195C	-4.41361	no	-3.13316	yes	-1.23663	no
SPG4	-4.52623	no	-3.53329	yes	-0.949119	no
ENA1	-4.53267	yes	-3.65683	yes	-0.83201	no
HXT6	-4.58911	no	-3.85555	yes	-0.689729	no
DSF1	-4.73584	yes	-2.40847	no	-2.28354	no
JEN1	-4.84807	no	-3.92354	yes	-0.880702	no
YGR067C	-4.89324	yes	-2.69698	no	-2.15243	no
YBR285W	-4.89669	yes	-3.3628	yes	-1.49006	no
SPL2	-5.06628	yes	-3.40168	no	-1.62078	no
YLR307C-A	-5.60646	yes	-3.25595	no	-2.30669	no
ADY2	-5.6694	yes	-2.80145	no	-2.82412	no
FMP45	-5.84539	yes	-2.26971	no	-3.53185	no
RGI2	-6.27457	yes	-3.65847	yes	-2.57227	no
SPG1	-6.36527	yes	-4.04779	yes	-2.27365	no
ECM23	-6.71879	yes	-4.63949	no	-2.03547	no
PHO89	-7.51054	yes	-4.0623	yes	-3.40441	no
q_value	significant
0	yes
0	yes
log2(fold_change)	40836-ug2
1.49124	no
1.0676	no
-0.455929	no
